# Supplementary material for: The importance of national levels of eudaimonic well-being to life satisfaction in old age: a global study
Source: Springer Nature journal article supplement (doi:10.1007/s11136-018-1977-2), 2018-08-28
Supplement: MOESM1 [file 16078314]

| Table S1  *Descriptive Statistics* | | | | | | | | |
| --- | --- | --- | --- | --- | --- | --- | --- | --- |
|  | N | Age | % female | Life satisfaction | Economy | Health | EWB | Globalization |
| Albania | 1971 | 45.14 | 60.1% | 4.61 | 55.14 | 74.91 | .57 | 67.19 |
| Algeria | 989 | 38.87 | 52.3% | 5.42 | 54.26 | 74.49 | .71 | 53.18 |
| Argentina | 1953 | 46.21 | 60.3% | 6.56 | 60.41 | 75.63 | .69 | 63.02 |
| Armenia | 1981 | 46.51 | 58.2% | 4.18 | 54.14 | 67.71 | .46 | 67.09 |
| Australia | 1942 | 58.41 | 57.6% | 7.46 | 74.73 | 81.77 | .77 | 79.29 |
| Austria | 1978 | 46.47 | 52.5% | 7.17 | 75.79 | 79.46 | .72 | 87.91 |
| Azerbaijan | 1970 | 38.18 | 52.0% | 5.26 | 56.83 | 71.37 | .54 | 59.29 |
| Bahrain | 1975 | 35.38 | 35.8% | 5.94 | 70.33 | 78.51 | .72 | 68.04 |
| Bangladesh | 1976 | 36.99 | 53.0% | 4.58 | 58.01 | 67.78 | .57 | 45.54 |
| Belarus | 2037 | 43.81 | 59.6% | 5.47 | 65.61 | 69.43 | .53 | 59.15 |
| Belgium | 2014 | 47.82 | 46.5% | 7.06 | 74.44 | 81.47 | .71 | 87.87 |
| Benin | 1936 | 32.56 | 47.5% | 3.95 | 50.66 | 51.24 | .56 | 51.26 |
| Bolivia | 1955 | 38.66 | 58.3% | 5.62 | 61.05 | 65.38 | .70 | 59.92 |
| Botswana | 1950 | 37.49 | 64.4% | 3.74 | 57.69 | 69.93 | .69 | 59.09 |
| Brazil | 1981 | 44.44 | 58.3% | 6.34 | 65.88 | 70.68 | .65 | 59.64 |
| Bulgaria | 1989 | 52.73 | 58.5% | 4.86 | 59.76 | 69.26 | .51 | 79.52 |
| Burkina Faso | 1952 | 32.49 | 42.9% | 4.43 | 54.18 | 58.94 | .62 | 57.18 |
| Cambodia | 1959 | 40.18 | 65.7% | 4.23 | 64.65 | 66.68 | .59 | 56.67 |
| Cameroon | 1937 | 32.29 | 50.7% | 4.95 | 56.18 | 57.58 | .65 | 48.60 |
| Canada | 1149 | 52.08 | 53.3% | 7.41 | 75.91 | 80.98 | .74 | 83.45 |
| Central African Republic | 985 | 32.75 | 50.3% | 2.84 | 44.12 | 47.75 | .52 | 35.58 |
| Chad | 1974 | 32.24 | 45.2% | 4.30 | 44.94 | 45.21 | .58 | 41.49 |
| Chile | 2019 | 46.33 | 60.5% | 6.59 | 64.22 | 74.68 | .67 | 74.14 |
| China | 8408 | 46.19 | 52.7% | 5.27 | 70.69 | 76.47 | .46 | 61.23 |
| Colombia | 1961 | 43.40 | 60.8% | 6.17 | 61.22 | 72.55 | .71 | 61.68 |
| Congo Brazzaville | 1941 | 35.53 | 52.3% | 4.52 | 44.72 | 56.19 | .63 | 52.93 |
| Congo Kinshasa | 1988 | 31.83 | 45.1% | 4.43 | 42.98 | 55.52 | .59 | 41.94 |
| Costa Rica | 1968 | 44.60 | 57.8% | 6.95 | 63.44 | 78.26 | .74 | 67.67 |
| Croatia | 1961 | 46.16 | 54.7% | 5.52 | 62.65 | 73.62 | .50 | 79.04 |
| Cyprus | 1991 | 45.76 | 51.0% | 5.79 | 66.81 | 76.30 | .63 | 75.60 |
| Czech Republic | 1972 | 47.98 | 56.7% | 6.58 | 70.06 | 79.02 | .59 | 83.41 |
| Denmark | 1963 | 50.17 | 55.8% | 7.62 | 76.83 | 79.81 | .75 | 87.85 |
| Dominican Republic | 1838 | 40.90 | 57.8% | 4.95 | 59.42 | 71.66 | .73 | 61.52 |
| Ecuador | 1997 | 40.10 | 60.5% | 5.92 | 60.83 | 73.22 | .71 | 60.67 |
| Egypt | 1998 | 39.49 | 48.5% | 4.65 | 56.60 | 69.78 | .60 | 60.87 |
| El Salvador | 1900 | 37.66 | 53.3% | 5.98 | 60.95 | 73.35 | .69 | 65.86 |
| Estonia | 1981 | 52.99 | 62.2% | 5.39 | 69.77 | 73.76 | .57 | 81.97 |
| Ethiopia | 1973 | 32.09 | 58.0% | 4.44 | 58.51 | 58.29 | .59 | 42.51 |
| Finland | 1987 | 57.38 | 54.5% | 7.60 | 75.48 | 80.23 | .73 | 85.98 |
| France | 1987 | 48.31 | 54.0% | 6.60 | 72.92 | 81.28 | .68 | 87.34 |
| Gabon | 1926 | 33.74 | 49.7% | 4.83 | 46.68 | 57.02 | .63 | 53.19 |
| Georgia | 1994 | 48.29 | 55.7% | 4.26 | 57.94 | 68.80 | .48 | 72.50 |
| Germany | 1994 | 48.39 | 51.9% | 6.94 | 77.07 | 81.47 | .72 | 86.89 |
| Ghana | 1955 | 33.72 | 48.0% | 4.26 | 58.48 | 61.86 | .69 | 57.60 |
| Greece | 1998 | 50.79 | 55.8% | 5.44 | 59.23 | 77.13 | .54 | 80.31 |
| Guatemala | 1855 | 35.69 | 56.6% | 6.43 | 59.63 | 65.48 | .74 | 63.17 |
| Guinea | 1983 | 36.48 | 48.3% | 3.64 | 50.82 | 49.24 | .63 | 47.10 |
| Honduras | 1795 | 37.66 | 56.3% | 5.11 | 56.13 | 71.00 | .69 | 61.71 |
| Hong Kong | 859 | 44.46 | 49.4% | 5.46 | 73.23 | 81.91 | .60 | 65.89 |
| Hungary | 1978 | 53.46 | 57.0% | 5.33 | 64.82 | 74.90 | .50 | 84.20 |
| Iceland | 1091 | 48.08 | 56.6% | 7.52 | 73.42 | 80.04 | .75 | 70.62 |
| India | 5985 | 36.82 | 46.5% | 4.25 | 62.22 | 62.54 | .59 | 56.77 |
| Indonesia | 1938 | 37.89 | 58.9% | 5.10 | 64.90 | 68.83 | .72 | 62.04 |
| Iran | 1976 | 38.11 | 49.9% | 4.82 | 54.55 | 69.17 | .59 | 48.66 |
| Iraq | 1973 | 35.09 | 41.2% | 4.57 | 45.18 | 57.21 | .63 | 39.06 |
| Ireland | 1988 | 46.13 | 51.6% | 6.98 | 71.03 | 79.59 | .74 | 83.53 |
| Israel | 1977 | 42.50 | 51.0% | 7.07 | 69.50 | 81.49 | .63 | 75.73 |
| Italy | 1992 | 47.80 | 54.0% | 6.05 | 65.21 | 78.04 | .60 | 82.15 |
| Ivory Coast | 1956 | 33.91 | 40.3% | 4.64 | 53.16 | 52.10 | .63 | 54.02 |
| Japan | 1953 | 58.65 | 53.4% | 5.95 | 72.56 | 83.60 | .56 | 77.30 |
| Jordan | 1994 | 36.97 | 54.0% | 5.42 | 58.72 | 75.09 | .66 | 74.31 |
| Kazakhstan | 1965 | 41.08 | 58.0% | 5.68 | 65.58 | 71.39 | .60 | 59.10 |
| Kenya | 1987 | 32.38 | 51.7% | 4.46 | 56.99 | 59.91 | .72 | 56.33 |
| Kuwait | 1892 | 36.23 | 27.9% | 6.01 | 64.86 | 78.33 | .72 | 70.21 |
| Kyrgyzstan | 1983 | 41.15 | 64.2% | 4.89 | 60.72 | 73.16 | .64 | 60.94 |
| Latvia | 1979 | 48.43 | 63.0% | 5.92 | 67.30 | 70.50 | .54 | 75.42 |
| Lebanon | 1996 | 37.97 | 51.2% | 5.32 | 60.51 | 70.22 | .58 | 67.17 |
| Lesotho | 980 | 41.96 | 59.5% | 3.76 | 43.70 | 60.64 | .66 | 51.98 |
| Liberia | 1936 | 32.76 | 56.1% | 3.10 | 47.39 | 49.73 | .68 | 56.05 |
| Libya | 1614 | 34.42 | 34.5% | 5.50 | 45.35 | 73.28 | .71 | 52.26 |
| Lithuania | 1930 | 48.36 | 60.5% | 5.86 | 64.63 | 70.95 | .48 | 78.78 |
| Luxembourg | 1994 | 46.65 | 51.1% | 6.98 | 77.33 | 84.92 | .71 | 79.33 |
| Macedonia | 2013 | 45.84 | 52.5% | 5.14 | 57.26 | 72.40 | .54 | 70.47 |
| Madagascar | 1997 | 36.78 | 54.4% | 3.79 | 46.99 | 55.24 | .57 | 46.78 |
| Malawi | 1971 | 33.15 | 59.0% | 3.75 | 50.97 | 61.70 | .66 | 46.98 |
| Malaysia | 976 | 36.43 | 52.0% | 6.13 | 72.82 | 76.92 | .64 | 79.28 |
| Mali | 1936 | 34.82 | 50.3% | 4.25 | 47.53 | 59.02 | .65 | 51.07 |
| Malta | 1940 | 48.26 | 53.6% | 6.57 | 69.03 | 80.81 | .72 | 77.51 |
| Mauritania | 1976 | 35.57 | 44.1% | 4.26 | 42.26 | 63.51 | .59 | 53.91 |
| Mauritius | 993 | 47.22 | 55.4% | 5.59 | 67.05 | 75.83 | .69 | 69.60 |
| Mexico | 2028 | 40.48 | 53.1% | 6.55 | 60.72 | 72.76 | .64 | 70.46 |
| Moldova | 1952 | 41.72 | 55.1% | 5.70 | 59.38 | 66.50 | .51 | 67.97 |
| Mongolia | 1987 | 39.81 | 54.5% | 4.93 | 63.24 | 69.13 | .60 | 65.12 |
| Montenegro | 1996 | 46.46 | 51.0% | 5.24 | 56.85 | 72.02 | .52 | 62.22 |
| Morocco | 2014 | 40.36 | 59.4% | 5.16 | 62.53 | 69.81 | .61 | 67.01 |
| Mozambique | 964 | 32.52 | 54.7% | 4.69 | 47.62 | 51.90 | .63 | 48.99 |
| Nepal | 1887 | 35.88 | 62.0% | 4.97 | 65.40 | 62.59 | .60 | 46.26 |
| Netherlands | 1986 | 49.92 | 46.3% | 7.44 | 78.21 | 82.27 | .73 | 90.24 |
| New Zealand | 1931 | 56.37 | 58.2% | 7.44 | 79.64 | 81.45 | .78 | 78.00 |
| Nicaragua | 1873 | 38.01 | 55.4% | 5.81 | 59.30 | 71.23 | .69 | 60.68 |
| Niger | 1974 | 33.15 | 44.6% | 4.04 | 46.70 | 55.59 | .61 | 49.72 |
| Nigeria | 1957 | 31.55 | 44.9% | 5.24 | 45.46 | 53.48 | .72 | 54.99 |
| Norway | 1941 | 51.02 | 48.7% | 7.72 | 77.06 | 81.32 | .84 | 85.81 |
| Pakistan | 2000 | 34.41 | 50.0% | 5.25 | 57.75 | 59.08 | .53 | 52.53 |
| Panama | 1970 | 44.05 | 56.5% | 6.25 | 66.25 | 71.73 | .74 | 69.89 |
| Paraguay | 1993 | 43.12 | 51.4% | 5.46 | 62.31 | 73.36 | .64 | 64.43 |
| Peru | 1946 | 40.10 | 56.7% | 5.70 | 64.32 | 69.27 | .71 | 67.98 |
| Philippines | 1995 | 40.94 | 55.9% | 5.44 | 62.02 | 68.28 | .75 | 64.08 |
| Poland | 1950 | 49.16 | 57.5% | 6.01 | 67.29 | 75.11 | .56 | 78.72 |
| Portugal | 2007 | 46.36 | 52.6% | 5.46 | 67.34 | 76.35 | .66 | 82.21 |
| Romania | 1974 | 53.77 | 58.4% | 5.76 | 61.66 | 69.93 | .58 | 77.88 |
| Russia | 3898 | 44.21 | 68.2% | 5.92 | 62.35 | 66.74 | .55 | 69.06 |
| Rwanda | 1992 | 34.07 | 53.4% | 3.46 | 58.07 | 71.33 | .65 | 53.17 |
| Saudi Arabia | 1964 | 30.69 | 40.4% | 6.36 | 61.76 | 75.60 | .67 | 61.86 |
| Senegal | 1967 | 33.54 | 49.6% | 4.74 | 49.54 | 62.53 | .70 | 63.29 |
| Serbia | 1991 | 48.08 | 54.4% | 5.42 | 56.27 | 69.88 | .46 | 73.97 |
| Sierra Leone | 1845 | 34.72 | 54.6% | 4.72 | 53.75 | 54.54 | .70 | 47.65 |
| Singapore | 1968 | 46.47 | 54.4% | 6.27 | 77.90 | 84.39 | .67 | 78.63 |
| Slovakia | 1984 | 48.50 | 58.9% | 6.00 | 65.28 | 75.39 | .54 | 80.74 |
| Slovenia | 1971 | 51.35 | 52.8% | 5.97 | 68.97 | 77.91 | .68 | 79.76 |
| South Africa | 1976 | 34.01 | 50.5% | 5.01 | 55.46 | 58.61 | .73 | 68.63 |
| South Korea | 1965 | 49.82 | 47.8% | 5.79 | 70.42 | 80.76 | .51 | 76.67 |
| Spain | 1996 | 43.27 | 51.3% | 6.46 | 66.50 | 80.93 | .68 | 84.53 |
| Sri Lanka | 1051 | 45.60 | 56.0% | 4.68 | 66.56 | 77.21 | .76 | 55.25 |
| Sweden | 1964 | 52.93 | 53.6% | 7.40 | 77.66 | 82.26 | .73 | 88.05 |
| Switzerland | 1472 | 51.98 | 52.2% | 7.63 | 77.74 | 83.91 | .76 | 89.70 |
| Tajikistan | 1993 | 35.72 | 55.6% | 5.17 | 57.24 | 72.12 | .62 | 45.47 |
| Tanzania | 1994 | 35.01 | 58.1% | 3.35 | 55.96 | 58.86 | .65 | 48.06 |
| Thailand | 1954 | 44.63 | 60.2% | 6.07 | 72.39 | 79.03 | .66 | 68.15 |
| Togo | 1960 | 33.29 | 46.4% | 4.00 | 51.22 | 54.25 | .57 | 56.12 |
| Tunisia | 1987 | 38.35 | 50.5% | 4.87 | 58.00 | 71.74 | .58 | 64.86 |
| Turkey | 1973 | 40.32 | 50.8% | 5.59 | 66.23 | 74.66 | .59 | 70.87 |
| Uganda | 1959 | 31.58 | 53.7% | 4.30 | 62.57 | 54.35 | .70 | 52.66 |
| Ukraine | 1953 | 46.80 | 67.4% | 4.06 | 58.72 | 63.02 | .51 | 70.60 |
| United Arab Emirates | 3539 | 36.15 | 40.2% | 7.01 | 73.26 | 78.66 | .76 | 84.56 |
| United Kingdom | 1988 | 46.51 | 53.0% | 6.71 | 76.35 | 80.54 | .73 | 82.43 |
| United States | 1074 | 52.79 | 47.4% | 6.97 | 75.78 | 78.29 | .73 | 79.95 |
| Uruguay | 1982 | 49.71 | 63.9% | 6.37 | 66.28 | 76.90 | .70 | 70.98 |
| Venezuela | 1974 | 41.99 | 57.8% | 4.84 | 48.49 | 72.09 | .62 | 54.08 |
| Vietnam | 1958 | 42.91 | 54.1% | 5.03 | 68.50 | 73.05 | .61 | 61.59 |
| Yemen | 1989 | 34.61 | 49.8% | 3.45 | 38.58 | 58.72 | .53 | 52.78 |
| Zambia | 1945 | 32.11 | 58.7% | 4.78 | 46.74 | 59.29 | .70 | 56.19 |
| Zimbabwe | 1968 | 36.73 | 63.5% | 3.79 | 56.65 | 64.07 | .64 | 51.10 |
| Total | 264123 | 41.80 | 53.5% | 5.44 | 61.83 | 70.09 | .63 | 65.81 |

| Table S2  *The Components of the National-Level Variables of the Study* | |
| --- | --- |
| Moderator | Sub-indices and variables |
| Eudaimonic well-being | Learning experience, social support, respect, efficacy beliefs, sense of freedom, helping strangers, volunteering |
| Economic quality | Absolute poverty, Average economic growth in previous 5 years, Effectiveness of Anti-monopoly Policy, Export Diversification Index, Export Quality Index, Feelings about Household Income, Female labour Force Participation, Financial Engagement, Labour Force Participation, Prevalence of trade barriers, Relative poverty, Satisfied with Standard of Living, Unemployment |
| Healthcare | Diabetes Prevalence, Health Problems, Immunization against DPT, Immunization against Measles, Improved Sanitation Facilities, Joy, Life Expectancy at Birth, Mortality Rate, Obesity Prevalence, Sadness, Satisfaction with Healthcare, TB deaths |
| Globalization | Trade in goods, Trade in services, Trade partner diversification, Foreign direct investment, Portfolio investment, International debt, International reserves, International income payments, Trade regulations, Trade taxes, Tariffs, Capital account openness 1, Capital account openness 2, International voice traffic, Transfers, International tourism , Migration, Patent applications, International students, High technology exports, Trade in cultural goods, Trademark applications, Trade in personal services, McDonald's restaurant, IKEA stores, Telephone subscriptions, Freedom to visit, International airports, television, Internet user, Press freedom, internet bandwidth, gender parity, Expenditure on education, Civil freedom, Embassies, UN peace keeping missions, International NGOs, International organizations, International treaties, Number of partners in investment treaties UNCTAD |
| **Sources**: Information on economic quality and healthcare come from Legatum Institute (2017). Information on the KOF globalization index come from Gygli, Florian, and Jan-Egbert (2018) | |

| Table S3  *Fixed Effects for the Model Including the Interaction Term of Eudaimonic Well-being and Age* | | | | | |
| --- | --- | --- | --- | --- | --- |
|  | Estimate | *t* | *p* | 95% CI | | |
| Low | Up | |
| Personal age | -.005 | -6.556 | .000 | -.006 | -.003 | |
| Quadratic age | .000 | 7.544 | .000 | .000 | .000 | |
| Female | .092 | 6.316 | .000 | .063 | .121 | |
| Secondary education | .386 | 24.539 | .000 | .355 | .417 | |
| Tertiary education | .757 | 31.707 | .000 | .709 | .804 | |
| A rural area or on a farm | -.229 | -7.758 | .000 | -.287 | -.170 | |
| A small town or village | -.127 | -6.018 | .000 | -.168 | -.085 | |
| Health problems | -.391 | -21.449 | .000 | -.428 | -.355 | |
| Social support | .581 | 25.984 | .000 | .536 | .625 | |
| Satisfaction with standards of living | 1.319 | 37.845 | .000 | 1.250 | 1.388 | |
| Eudaimonic well-being | 1.761 | 2.407 | .018 | .313 | 3.208 | |
| Economic quality | .024 | 2.188 | .031 | .002 | .045 | |
| Healthcare | -.014 | -1.236 | .219 | -.036 | .008 | |
| Globalization | .025 | 3.186 | .002 | .009 | .041 | |
| National age | .002 | .143 | .887 | -.025 | .029 | |
| Personal age × Eudaimonic well-being | .046 | 5.227 | .000 | .028 | .063 | |

| Table S4  *Fixed Effects for the Model Including the Interaction Term of Economic Quality and Age* | | | | | |
| --- | --- | --- | --- | --- | --- |
|  | Estimate | *t* | *p* | 95% CI | | |
| Low | Up | |
| Personal age | -.005 | -6.248 | .000 | -.006 | -.003 | |
| Quadratic age | .000 | 7.425 | .000 | .000 | .000 | |
| Female | .092 | 6.302 | .000 | .063 | .121 | |
| Secondary education | .384 | 24.520 | .000 | .353 | .415 | |
| Tertiary education | .756 | 31.746 | .000 | .709 | .803 | |
| A rural area or on a farm | -.229 | -7.767 | .000 | -.287 | -.171 | |
| A small town or village | -.127 | -6.028 | .000 | -.168 | -.085 | |
| Health problems | -.392 | -21.444 | .000 | -.428 | -.355 | |
| Social support | .581 | 26.002 | .000 | .536 | .625 | |
| Satisfaction with standards of living | 1.319 | 37.837 | .000 | 1.250 | 1.388 | |
| Eudaimonic well-being | 1.748 | 2.388 | .018 | .300 | 3.196 | |
| Economic quality | .024 | 2.194 | .030 | .002 | .046 | |
| Healthcare | -.014 | -1.239 | .218 | -.036 | .008 | |
| Globalization | .025 | 3.185 | .002 | .009 | .041 | |
| National age | .002 | .145 | .885 | -.025 | .029 | |
| Personal age × Economic quality | .000 | 2.133 | .035 | .000 | .000 | |

| Table S5  *Fixed Effects for the Model Including the Interaction Term of Healthcare and Age* | | | | | |
| --- | --- | --- | --- | --- | --- |
|  | Estimate | *t* | *p* | 95% CI | | |
| Low | Up | |
| Personal age | -.005 | -6.047 | .000 | -.006 | -.003 | |
| Quadratic age | .000 | 7.499 | .000 | .000 | .000 | |
| Female | .092 | 6.313 | .000 | .063 | .121 | |
| Secondary education | .385 | 24.510 | .000 | .354 | .416 | |
| Tertiary education | .756 | 31.746 | .000 | .709 | .803 | |
| A rural area or on a farm | -.229 | -7.761 | .000 | -.287 | -.171 | |
| A small town or village | -.127 | -6.023 | .000 | -.168 | -.085 | |
| Health problems | -.392 | -21.516 | .000 | -.428 | -.356 | |
| Social support | .581 | 26.000 | .000 | .536 | .625 | |
| Satisfaction with standards of living | 1.319 | 37.835 | .000 | 1.250 | 1.388 | |
| Eudaimonic well-being | 1.750 | 2.390 | .018 | .301 | 3.198 | |
| Economic quality | .024 | 2.188 | .031 | .002 | .045 | |
| Healthcare | -.014 | -1.236 | .219 | -.036 | .008 | |
| Globalization | .025 | 3.182 | .002 | .009 | .041 | |
| National age | .002 | .145 | .885 | -.025 | .029 | |
| Personal age × Healthcare | .000 | .836 | .404 | .000 | .000 | |

| Table S6  *Fixed Effects for the Model Including the Interaction Term of Globalization and Age* | | | | | |
| --- | --- | --- | --- | --- | --- |
|  | Estimate | *t* | *p* | 95% CI | | |
| Low | Up | |
| Personal age | -.005 | -6.003 | .000 | -.006 | -.003 | |
| Quadratic age | .000 | 7.523 | .000 | .000 | .000 | |
| Female | .092 | 6.318 | .000 | .063 | .121 | |
| Secondary education | .385 | 24.491 | .000 | .354 | .416 | |
| Tertiary education | .756 | 31.740 | .000 | .709 | .803 | |
| A rural area or on a farm | -.229 | -7.760 | .000 | -.287 | -.171 | |
| A small town or village | -.127 | -6.023 | .000 | -.168 | -.085 | |
| Health problems | -.392 | -21.539 | .000 | -.428 | -.356 | |
| Social support | .580 | 26.003 | .000 | .536 | .625 | |
| Satisfaction with standards of living | 1.319 | 37.836 | .000 | 1.250 | 1.388 | |
| Eudaimonic well-being | 1.750 | 2.391 | .018 | .302 | 3.199 | |
| Economic quality | .024 | 2.189 | .030 | .002 | .045 | |
| Healthcare | -.014 | -1.240 | .217 | -.036 | .008 | |
| Globalization | .025 | 3.182 | .002 | .009 | .041 | |
| National age | .002 | .146 | .884 | -.025 | .029 | |
| Personal age × Globalization | .000 | .310 | .757 | .000 | .000 | |

| Table S7  *Fixed Effects for the Model Including the Interaction Term of National Age and Personal Age* | | | | | |
| --- | --- | --- | --- | --- | --- |
|  | Estimate | *t* | *p* | 95% CI | | |
| Low | Up | |
| Personal age | -.005 | -6.037 | .000 | -.006 | -.003 | |
| Quadratic age | .000 | 7.622 | .000 | .000 | .000 | |
| Female | .093 | 6.330 | .000 | .064 | .122 | |
| Secondary education | .385 | 24.492 | .000 | .354 | .416 | |
| Tertiary education | .756 | 31.760 | .000 | .709 | .804 | |
| A rural area or on a farm | -.229 | -7.753 | .000 | -.287 | -.170 | |
| A small town or village | -.127 | -6.018 | .000 | -.168 | -.085 | |
| Health problems | -.392 | -21.618 | .000 | -.428 | -.356 | |
| Social support | .580 | 26.007 | .000 | .536 | .625 | |
| Satisfaction with standards of living | 1.319 | 37.839 | .000 | 1.250 | 1.388 | |
| Eudaimonic well-being | 1.752 | 2.393 | .018 | .303 | 3.200 | |
| Economic quality | .024 | 2.190 | .030 | .002 | .045 | |
| Healthcare | -.014 | -1.242 | .217 | -.036 | .008 | |
| Globalization | .025 | 3.179 | .002 | .009 | .041 | |
| National age | .002 | .146 | .884 | -.025 | .029 | |
| Personal age × Healthcare | .000 | -1.178 | .241 | .000 | .000 | |

| Table S8  *Fixed Effects for the Model Including the Interaction Term of Eudaimonic Well-Being and Personal Age as well as the Interaction Term of Economic Quality and Age* | | | | | |
| --- | --- | --- | --- | --- | --- |
|  | Estimate | *t* | *p* | 95% CI | | |
| Low | Up | |
| Personal age | -.005 | -6.570 | .000 | -.006 | -.003 | |
| Quadratic age | .000 | 7.495 | .000 | .000 | .000 | |
| Female | .092 | 6.310 | .000 | .063 | .121 | |
| Secondary education | .386 | 24.543 | .000 | .355 | .417 | |
| Tertiary education | .757 | 31.709 | .000 | .709 | .804 | |
| A rural area or on a farm | -.229 | -7.761 | .000 | -.287 | -.170 | |
| A small town or village | -.127 | -6.020 | .000 | -.168 | -.085 | |
| Health problems | -.391 | -21.419 | .000 | -.427 | -.355 | |
| Social support | .581 | 25.985 | .000 | .536 | .625 | |
| Satisfaction with standards of living | 1.319 | 37.844 | .000 | 1.250 | 1.388 | |
| Eudaimonic well-being | 1.759 | 2.405 | .018 | .312 | 3.207 | |
| Economic quality | .024 | 2.190 | .030 | .002 | .045 | |
| Healthcare | -.014 | -1.235 | .219 | -.036 | .008 | |
| Globalization | .025 | 3.187 | .002 | .010 | .041 | |
| National age | .002 | .142 | .887 | -.025 | .029 | |
| Personal age × Eudaimonic well-being | .044 | 4.727 | .000 | .025 | .062 | |
| Personal age × Economic quality | .000 | .609 | .544 | .000 | .000 | |


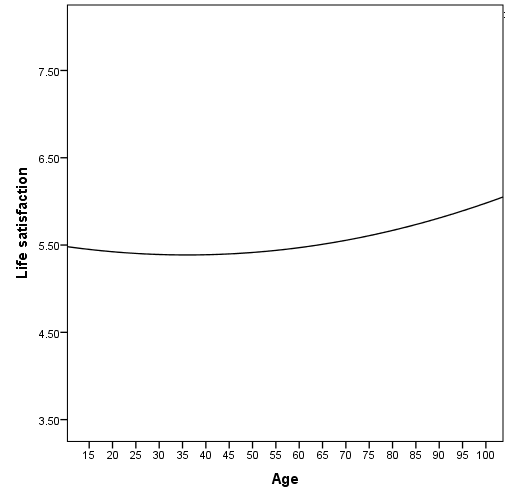


Figure S1

The quadratic relationship between age and life satisfaction
